# Supplementary material
Source: MDPI journal article supplement (https://www.mdpi.com/2073-4441/12/1/206)
Supplement: s1 [file s1]

## Supplementary materials

### *Sediment quality indices*

Enrichment Factor (EF) (Abraham and Parker, 2008)

$$EF = \frac{E_x}{E_b} \times \frac{Al_b}{Al_x}$$

**Table S1: Range Classification for EF, ErF and PERI**

| Enrichment factor               | Range       | Definition                             |
|---------------------------------|-------------|----------------------------------------|
| EF                              | < 2         | Deficient to minimal enrichment        |
| EF                              | 2 – 4.99    | Moderate enrichment                    |
| EF                              | 5 – 19.99   | Significant enrichment                 |
| EF                              | 20- 39.99   | Very high enrichment                   |
| EF                              | ≥40         | Extremely high enrichment              |
| Ecological risk factors         | Range       | Description                            |
| ErF                             | < 40        | low potential ecological risk          |
| ErF                             | 40 – 79.9   | moderate potential ecological risk     |
| ErF                             | 80 – 159.9  | considerable potential ecological risk |
| ErF                             | 160 – 319.9 | high potential ecological risk         |
| ErF                             | ≥ 320       | very high ecological risk              |
| Potential ecological risk index | Range       | Description                            |
| PERI                            | < 150       | - low ecological risk                  |
| PERI                            | 150 – 299.9 | - moderate ecological risk             |
| PERI                            | 300 – 599.9 | - considerable ecological risk         |
| PERI                            | ≥ 600       | - very high ecological risk            |
